# Supplementary material
Source: Springer Nature journal article supplement (https://www.springermedizin.de/resource/supplementary/12891_2010_1021_MOESM2_ESM.pdf/9506954)

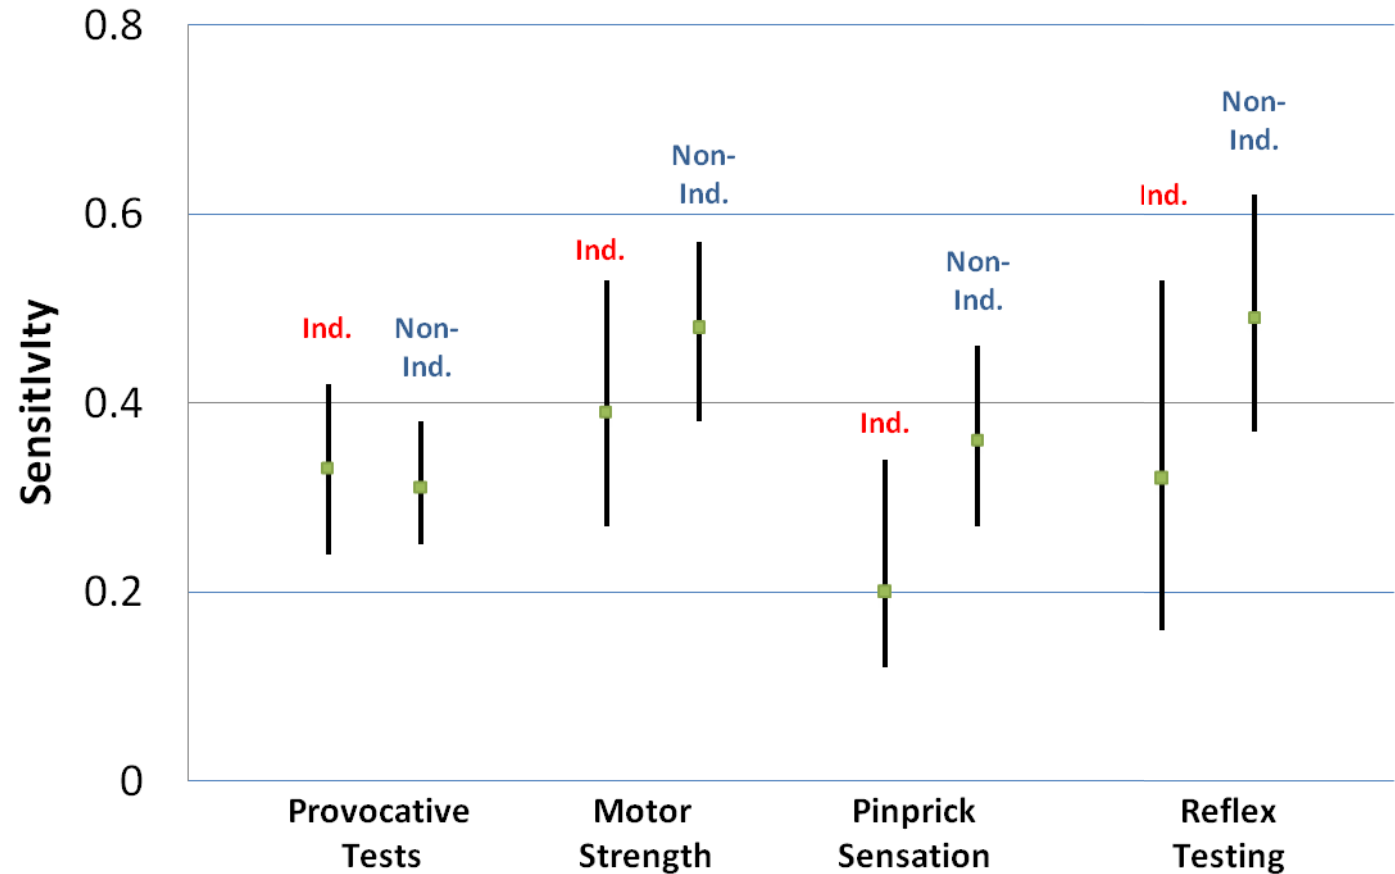

**Independent Group = Ind.**

**Non-Independent Group = Non-Ind.**

Supplement: MOESM2 [file 9506954]
